# Supplementary material
Source: publisher figshare collection journal article supplement (https://acs.figshare.com/ndownloader/files/9232951)
Supplement: Supplementary file 1 [file 9232951]

## ***Supporting Information***

### **Accurate Identification of Unknown and Known Metabolic Mixture Components by Combining 3D NMR and Fourier Transform Ion Cyclotron Resonance Tandem Mass Spectrometry**

Cheng Wang,<sup>†</sup> Lidong He,<sup>⊥</sup> Da-Wei Li,<sup>‡</sup> Lei Bruschweiler-Li,<sup>‡</sup> Alan G. Marshall,<sup>\*,⊥,¶</sup> and

Rafael Brüschweiler<sup>\*,†,‡,§</sup>

<sup>†</sup>Department of Chemistry and Biochemistry, <sup>‡</sup>Campus Chemical Instrument Center, and

<sup>§</sup>Department of Biological Chemistry and Pharmacology, The Ohio State University,

Columbus, Ohio 43210, United States

<sup>⊥</sup>Department of Chemistry and Biochemistry, Florida State University, Tallahassee,

Florida, 32306, United States

<sup>¶</sup>Ion Cyclotron Resonance Program, The National High Magnetic Field Laboratory,

Florida State University, Tallahassee,

Florida 32310, United States

## Content

Figure S1, Figure S2, Figure S3, Figure S4, Figure S5, Figure S6, Figure S7, Figure S8, Figure S9, Figure S10, Table S1, Table S2, Table S3 and Table S4.

Figure S1. Illustration of the spin system refinement procedure based on 2D HSQC, 2D TOCSY, and 2D/3D HSQC-TOCSY NMR spectra.

Figure S2. Predicted chemical shifts compared with their experimental chemical shifts of 25-compound model mixture.

Figure S3. Identical fragments of glutamine, glutathione, and glutamic acid show similar chemical shifts in 2D  $^{13}\text{C}$ - $^1\text{H}$  HSQC spectrum.

Figure S4. FT-ICR MS spectrum of *E. coli* cell lysate (positive mode).

Figure S5. FT-ICR MS/MS spectrum of arginine.

Figure S6. FT-ICR MS/MS spectrum of ornithine.

Figure S7. MS/MS spectrum of valine.

Figure S8. Motif identification of compound candidates for the spin system of an unknown compound from *E. coli* cell lysate.

Figure S9. Spin system of pyroglutamic acid spin system extracted from 3D HSQC-TOCSY and confirmed by 2D TOCSY and 2D HSQC-TOCSY.

Figure S10. Effect of TOCSY mixing time on magnetization transfer efficiency of inosine.

Table S1. Metabolites of *E. coli* cell lysate identified by COLMARm web server and database.

Table S2. Metabolites identified in *E. coli* cell lysate and verified by COLMAR web server and SUMMIT MS/NMR.

Table S3. Quantum-chemical calculation of NMR chemical shifts for two selected compounds, together with matching results from experimental spectra.

Table S4. Unknown spin systems identified in *E. coli* cell lysate by 3D HSQC-TOCSY and compound candidates (top hits) returned by SUMMIT.

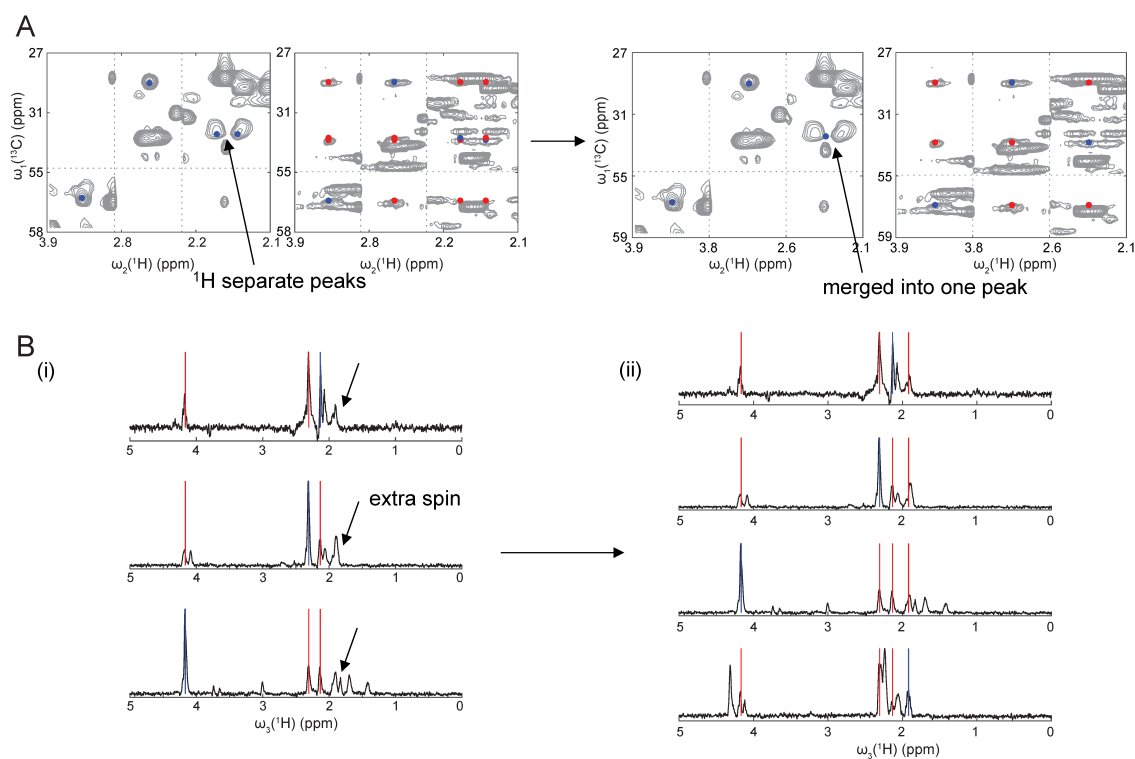

**Figure S1.** Illustration of the spin system refinement procedure based on 2D HSQC, 2D TOCSY, and 2D/3D HSQC-TOCSY NMR spectra. The following steps are depicted: a) merging of two separate  $^1\text{H}$  peaks into one peak; b) identification of extra spins (indicated by arrows in (i)) by 1D  $\omega_3$  ( $^1\text{H}$ ) trace comparison.

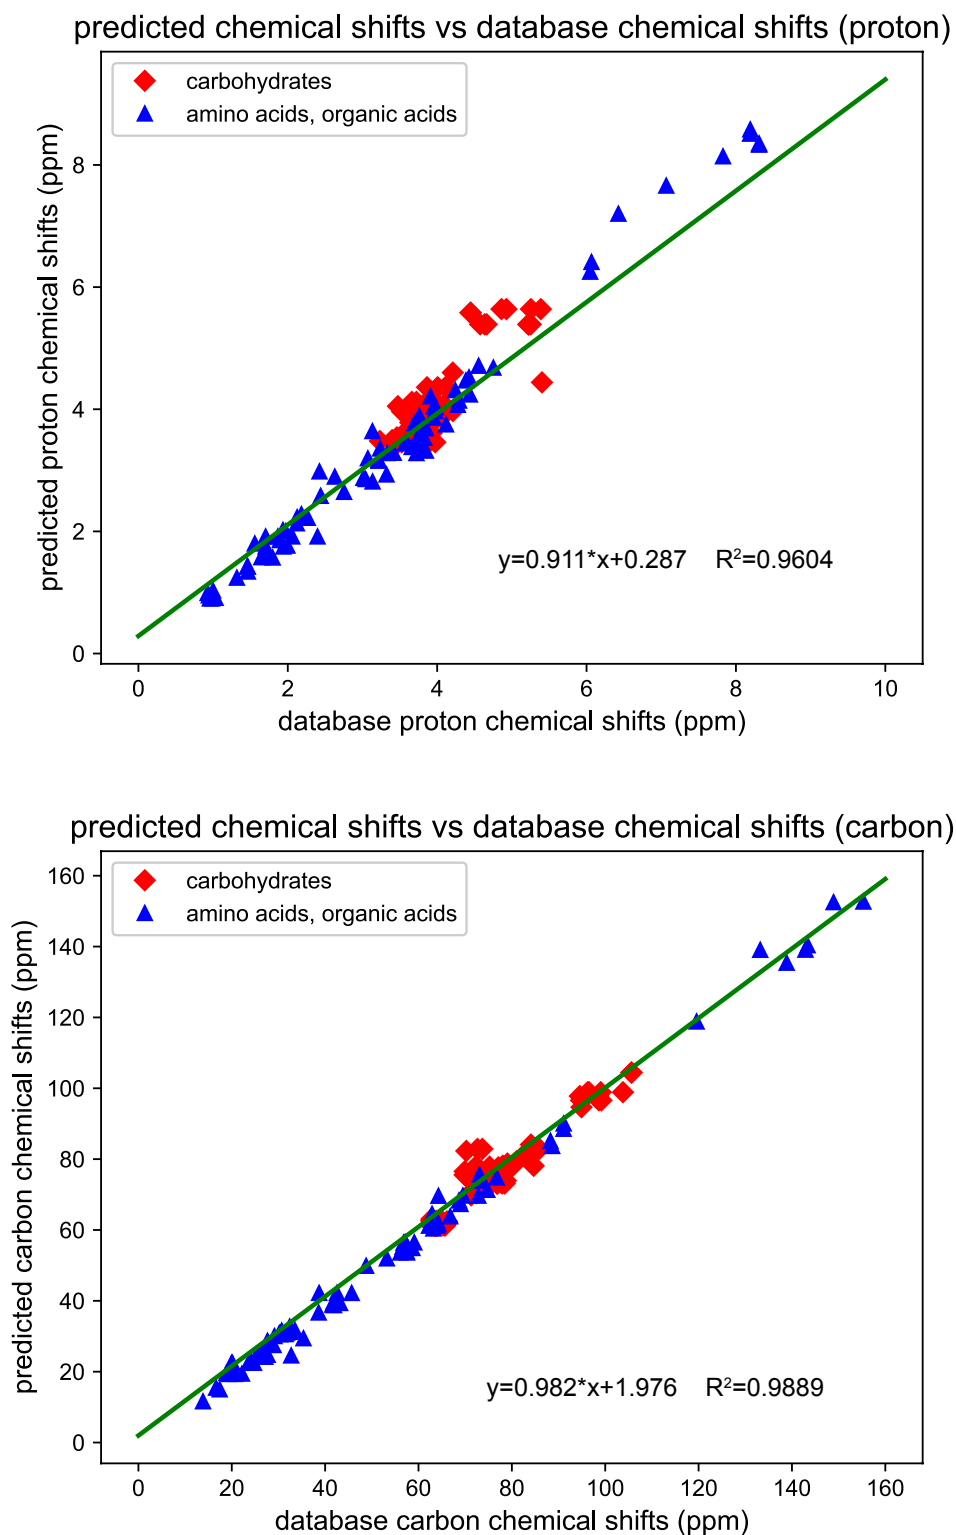

**Figure S2.** Predicted chemical shifts compared with their experimental chemical shifts of 25-compound model mixture. The RMSD between predicted and experimental chemical shifts of proton and carbon chemical shifts are 0.292 ppm and 2.903 ppm.

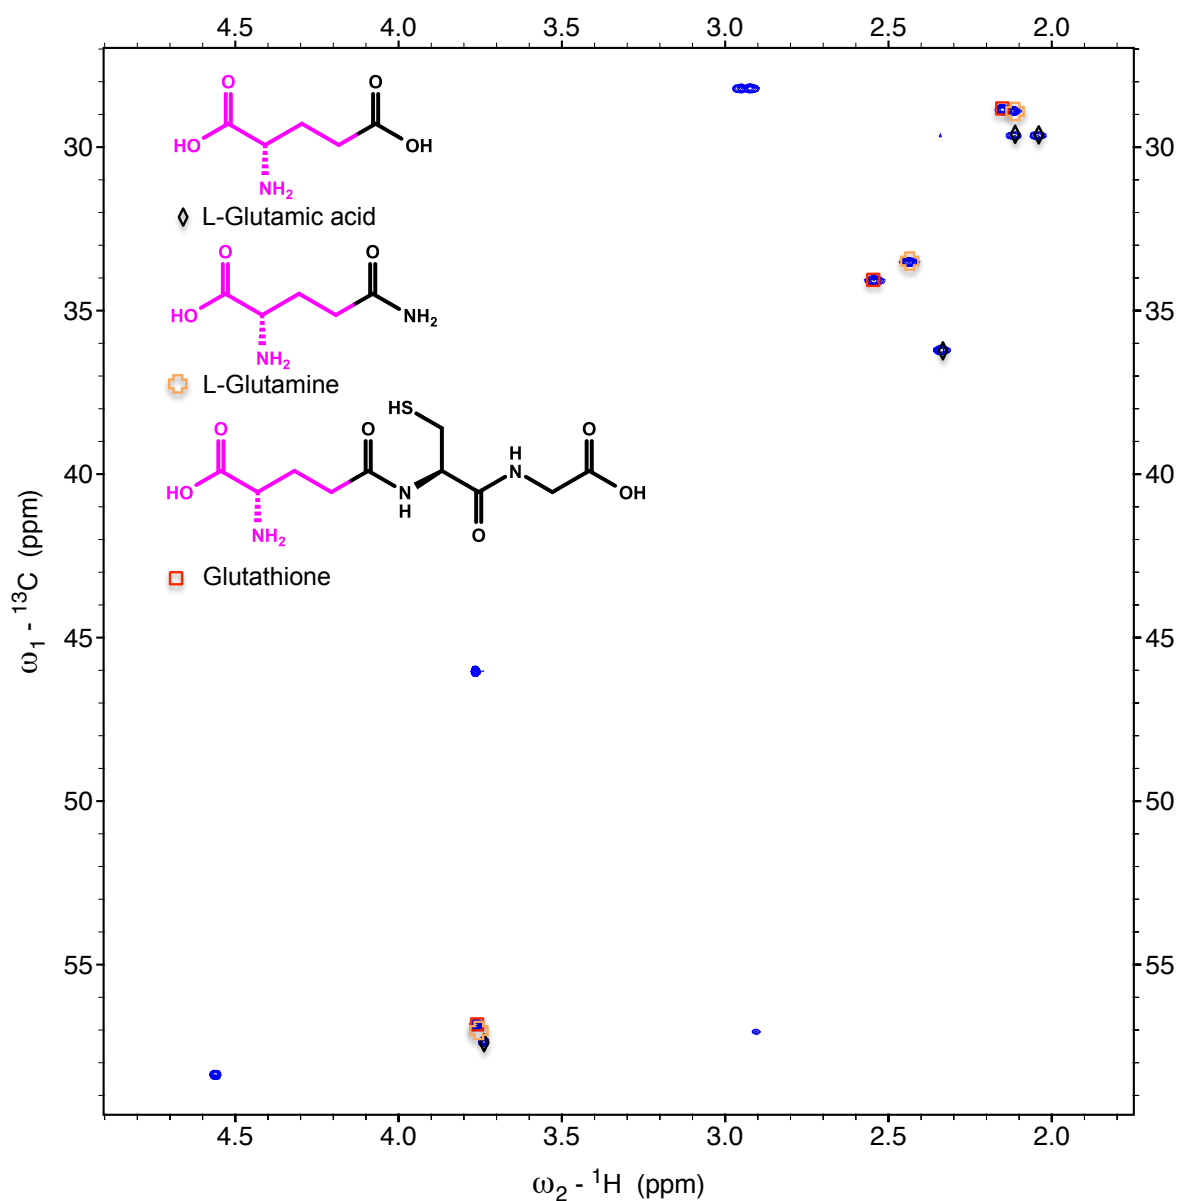

**Figure S3.** 2D  $^{13}\text{C}$ - $^1\text{H}$  HSQC of L-glutamine, glutathione, and L-glutamic acid mixture (peaks with the common motif ( $\text{HOOCCH}(\text{NH}_2)\text{CH}_2\text{CH}_2\text{CONH-}$ ) are highlighted by symbols). The spectrum illustrates the similarity of chemical shifts of identical fragments (colored in magenta) that are part of different molecules. Only cross-peaks that belong to the motif are labeled.

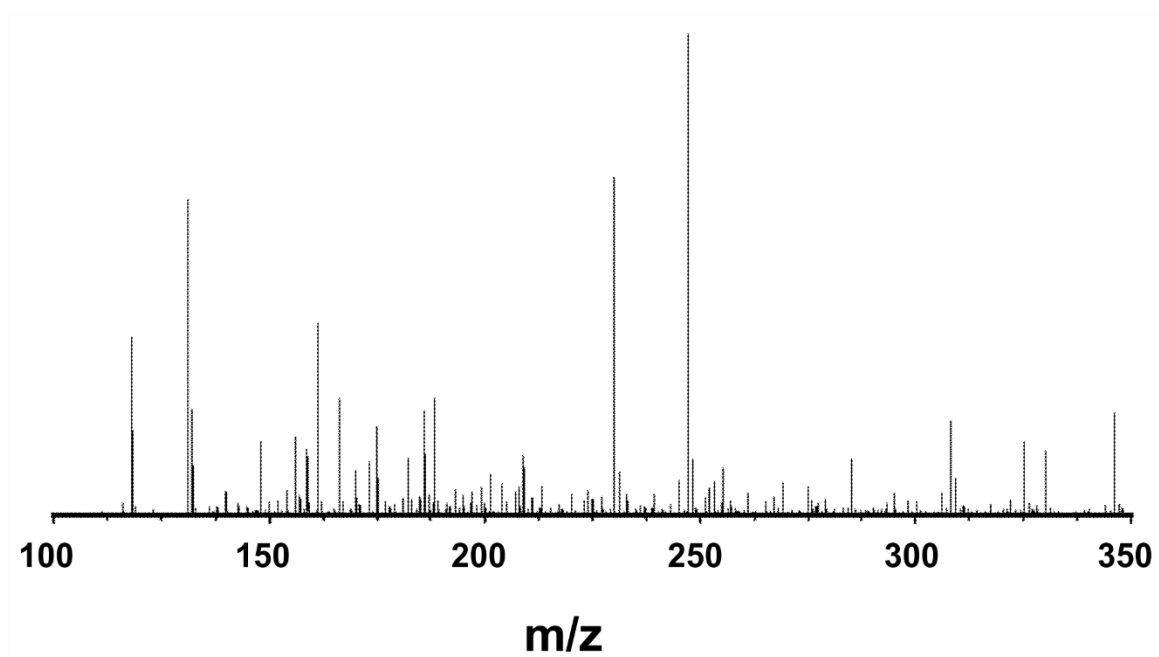

**Figure S4.** Positive electrospray ionization 9.4 T FT-ICR broadband mass spectrum of *E. coli* cell lysate.

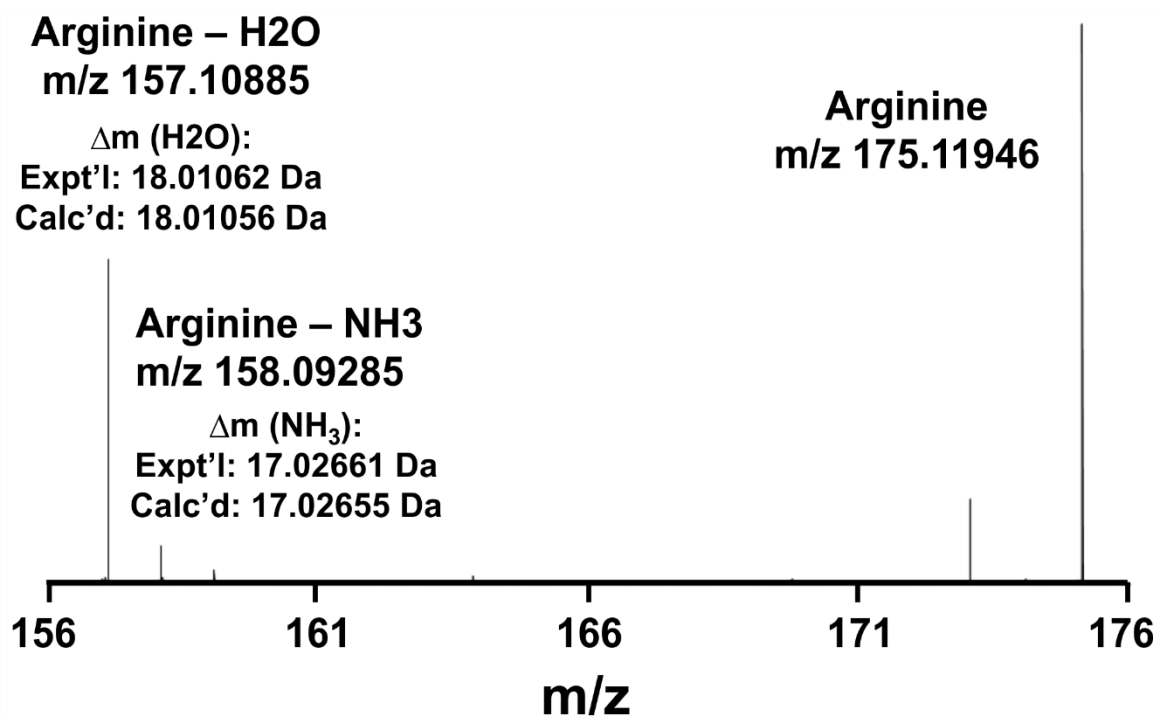

**Figure S5.** Infrared multiphoton dissociation positive electrospray ionization 9.4 T FT-ICR product ion mass spectrum of arginine.

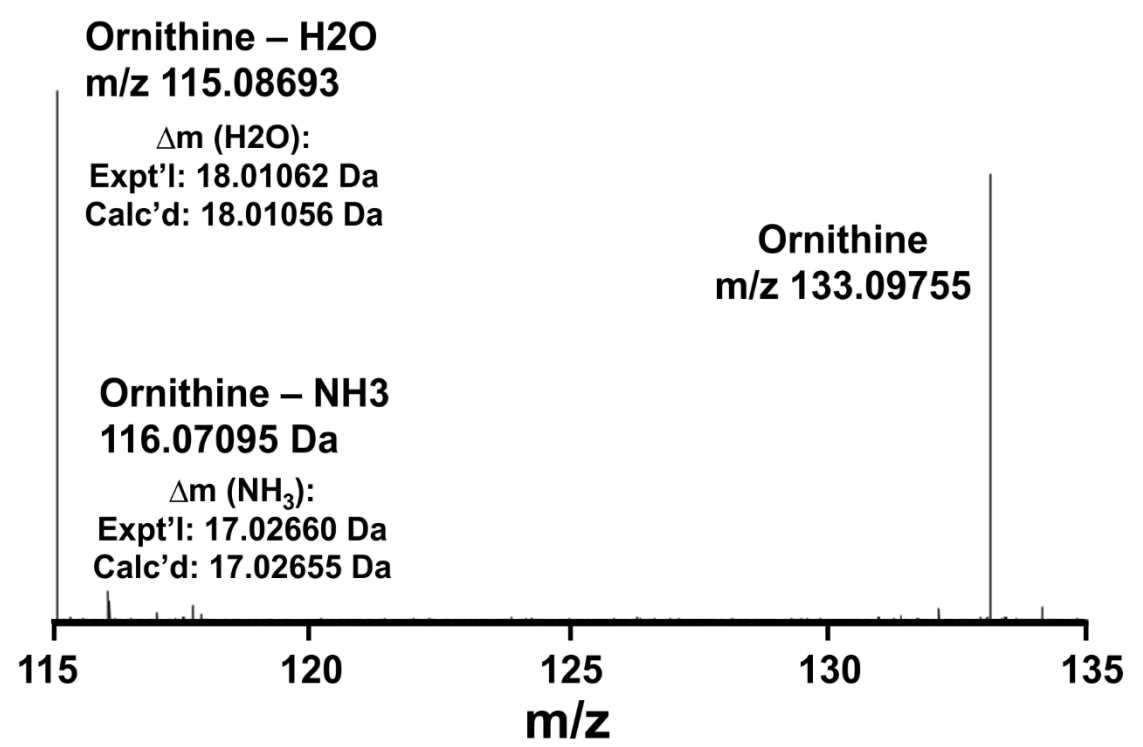

**Figure S6.** Infrared multiphoton dissociation positive electrospray ionization 9.4 T FT-ICR product ion mass spectrum of ornithine.



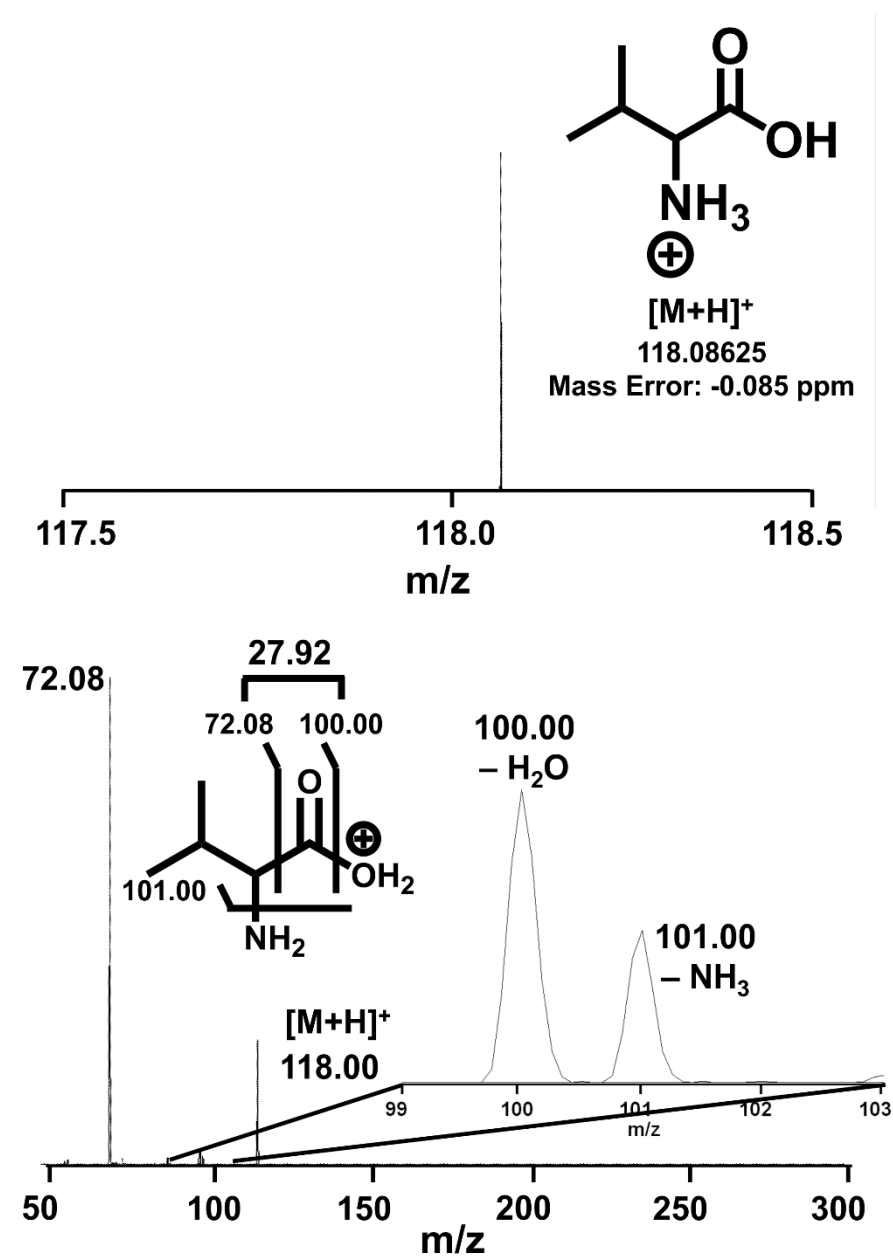

**Figure S7.** Collision-induced dissociation (normalized collision energy 22) Velos Pro product ion mass spectrum of valine.

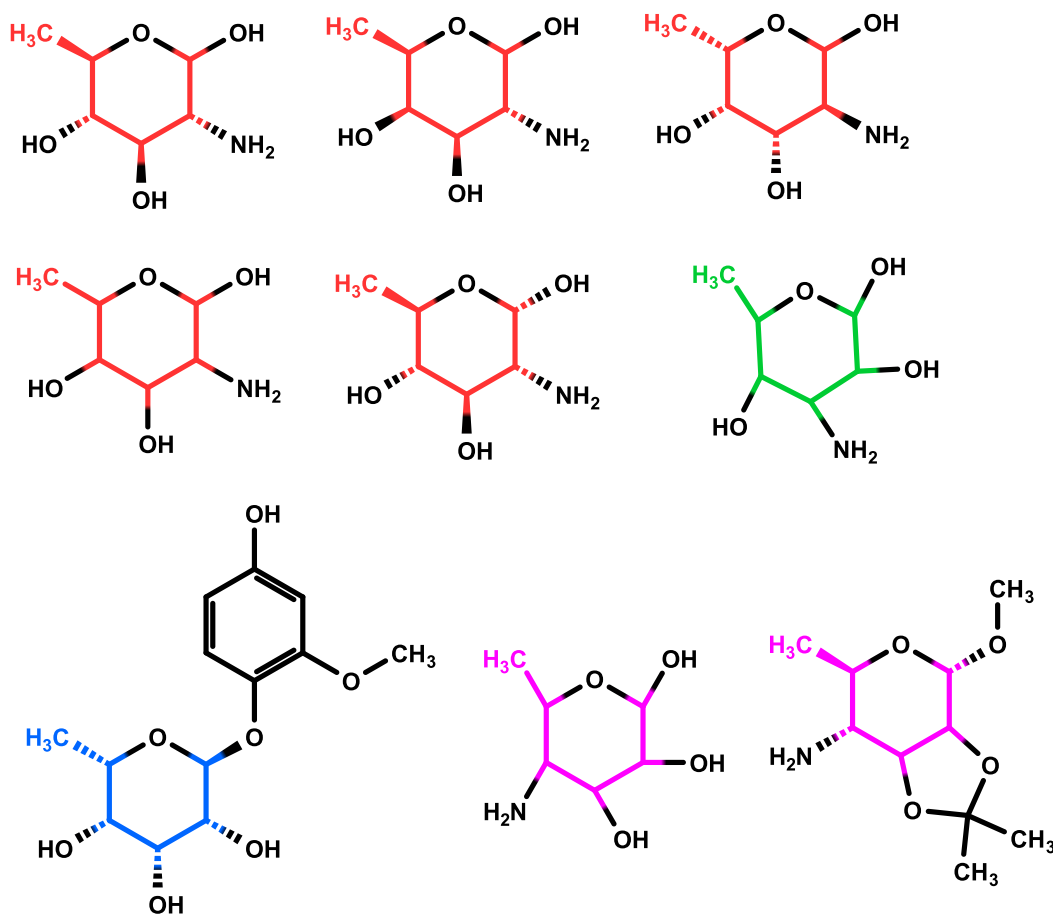

**Figure S8.** Motif identification of compound candidates for the spin system of an unknown compound from *E. coli* cell lysate. Four different motifs were identified, highlighted in red, green, blue and magenta, which are consistent with the NMR data.

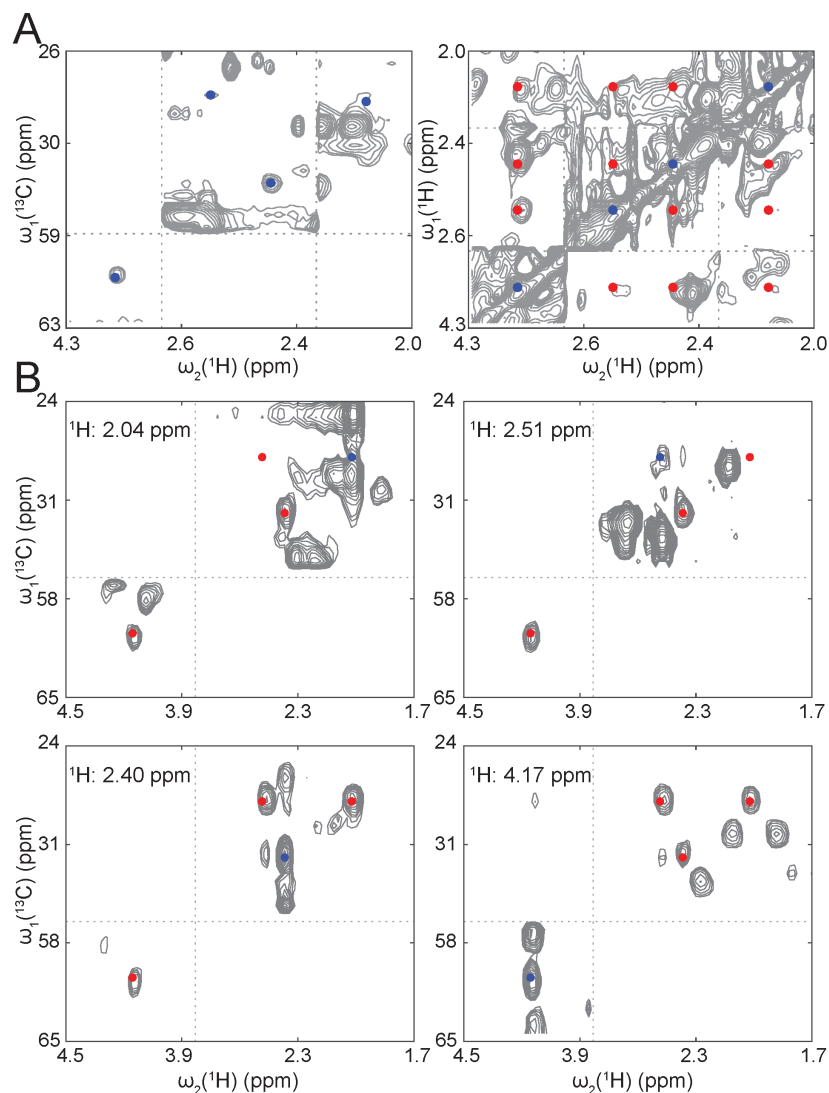

**Figure S9.** Spin system of pyroglutamic acid spin system extracted from 3D HSQC-TOCSY and confirmed by 2D TOCSY and 2D HSQC-TOCSY. a) Cross-peaks of pyroglutamic acid shown in the 2D HSQC (blue peaks) and 2D TOCSY spectra (blue and red). b) Four cross-peaks of pyroglutamic acid shown in multiple 2D slices of 3D HSQC-TOCSY. Cross-peaks ( $\delta_{\text{H}}$ ,  $\delta_{\text{C}}$ ) at (2.04, 28.0) ppm and (2.51, 28.0) ppm are two separate peaks of the same  $\text{CH}_2$  group.

### 3D HSQC-TOCSY mixing time optimization

To obtain a high quality 3D HSQC-TOCSY spectrum with maximal proton-proton magnetization transfer efficiency, optimization of the isotropic mixing time is critical for spin-system assignment and the sequential spin-system extraction process.<sup>1,2</sup> Because 3D HSQC-TOCSY and 2D  $^1\text{H}$ - $^1\text{H}$  TOCSY share the same pulse sequence element for isotropic mixing, the 25-compound model mixture was used for the 2D  $^1\text{H}$ - $^1\text{H}$  TOCSY experiment to obtain the optimal mixing time with good overall magnetization transfer efficiency between resonances at extreme ends of a spin system. A series of TOCSY experiments was performed with 40 ms, 80 ms, 100 ms, 110 ms, 120 ms and 130 ms mixing times. The effect of the TOCSY mixing time on proton-proton magnetization transfer efficiency is shown in Figure S10. Based on these results a mixing time of 120 ms was chosen for both 2D  $^1\text{H}$ - $^1\text{H}$  TOCSY and 3D HSQC-TOCSY experiment.

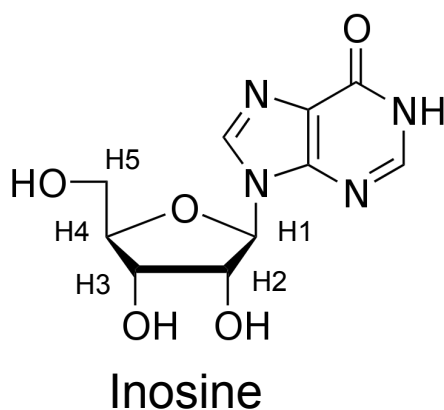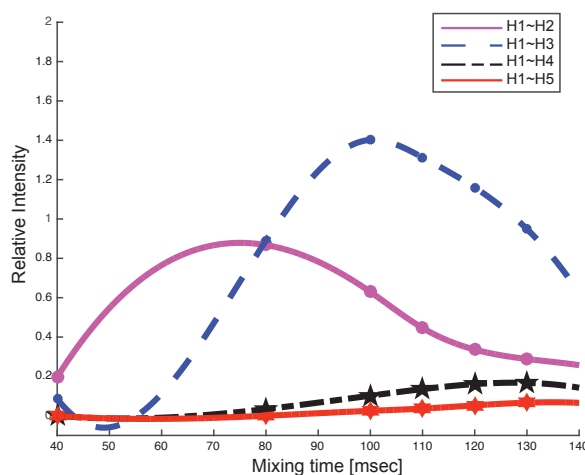

**Figure S10.** Effect of TOCSY-mixing time on magnetization transfer efficiency of inosine. The figure depicts magnetization transfer across the whole spin system as a function of the mixing time.

**Table S1.** Metabolites of *E. coli* cell lysate identified by COLMARm web server and database

| Compound identified by COLMARm         | Formula       | <sup>13</sup> C RMSD (ppm) | <sup>1</sup> H RMSD (ppm) |
|----------------------------------------|---------------|----------------------------|---------------------------|
| L-glutamine                            | C5H10N2O3     | 0.050                      | 0.019                     |
| L-valine                               | C5H11NO2      | 0.070                      | 0.013                     |
| maltose                                | C12H22O11     | 0.130                      | 0.010                     |
| cellobiose                             | C12H22O11     | 0.120                      | 0.010                     |
| N-acetyl-putrescine                    | C6H14N2O      | 0.180                      | 0.016                     |
| L-glutamic acid                        | C5H9NO4       | 0.070                      | 0.016                     |
| D-glucose                              | C6H12O6       | 0.130                      | 0.011                     |
| spermidine                             | C7H19N3       | 0.080                      | 0.016                     |
| L-phenylalanine                        | C9H11NO2      | 0.130                      | 0.015                     |
| L-tyrosine                             | C9H11NO3      | 0.180                      | 0.020                     |
| N- $\alpha$ -acetyl-L-lysine           | C8H16N2O3     | 0.160                      | 0.016                     |
| L-glutathione-reduced                  | C10H17N3O6S   | 0.090                      | 0.008                     |
| L-methionine                           | C5H11NO2S     | 0.050                      | 0.010                     |
| adenosine                              | C10H13N5O4    | 0.070                      | 0.011                     |
| inosine                                | C10H12N4O5    | 0.170                      | 0.019                     |
| L-proline                              | C5H9NO2       | 0.090                      | 0.015                     |
| leucine                                | C6H13NO2      | 0.060                      | 0.012                     |
| pyridoxamine-5-phosphate-1             | C8H13N2O5P    | 0.170                      | 0.014                     |
| guanosine                              | C10H13N5O5    | 0.130                      | 0.005                     |
| DL- $\alpha$ -glycerol-phosphoric acid | C3H9O6P       | 0.110                      | 0.010                     |
| N-acetyl-L-glutamine                   | C7H12N2O4     | 0.230                      | 0.017                     |
| D-glucuronic acid                      | C6H10O7       | 0.200                      | 0.011                     |
| methyl-uridine                         | C10H14N2O6    | 0.160                      | 0.018                     |
| dAMP                                   | C10H14N5O6P   | 0.150                      | 0.014                     |
| dTMP                                   | C10H15N2O8P   | 0.140                      | 0.019                     |
| UMP                                    | C9H13N2O9P    | 0.180                      | 0.013                     |
| ethanolamine                           | C2H7NO        | 0.130                      | 0.006                     |
| uracil                                 | C4H4N2O2      | 0.220                      | 0.021                     |
| N-acetyl-L-alanine                     | C5H9NO3       | 0.090                      | 0.012                     |
| malic acid                             | C4H6O5        | 0.080                      | 0.007                     |
| rhamnose                               | C6H12O5       | 0.110                      | 0.013                     |
| N1-acetyl-spermine                     | C12H28N4O     | 0.090                      | 0.010                     |
| cysteine-glutathione-disulfide         | C13H22N4O8S2  | 0.180                      | 0.011                     |
| dTTP                                   | C10H17N2O14P3 | 0.170                      | 0.022                     |
| UDP-GlcNAc                             | C17H27N3O17P2 | 0.110                      | 0.005                     |

|             |               |       |       |
|-------------|---------------|-------|-------|
| ADP         | C10H15N5O10P2 | 0.140 | 0.016 |
| ATP         | C10H16N5O13P3 | 0.110 | 0.019 |
| ITP         | C10H15N4O14P3 | 0.160 | 0.022 |
| UDP-glucose | C15H24N2O17P2 | 0.080 | 0.018 |
| NAD         | C21H27N7O14P2 | 0.060 | 0.018 |
| NADP+       | C21H29N7O17P3 | 0.170 | 0.017 |

**Table S2.** Metabolites identified in *E. coli* cell lysate and verified by COLMAR web server and SUMMIT MS/NMR. (Highlighted metabolites in **green** were consistent with identification by COLMARm (based on HSQC for query and TOCSY + HSQC-TOCSY for validation); highlighted metabolites in **blue** were identified based on the COLMAR HSQC database alone.

| Compound                      | Rank | Total hits<br>(RMSD<5.0 ppm) | Mass error<br>(ppm) | RMSD<br>(ppm) | RMSD (ppm)<br>(COLMAR) |
|-------------------------------|------|------------------------------|---------------------|---------------|------------------------|
| L-glutamine                   | 1    | 6268                         | 0.14                | 1.27          | 0.14                   |
| L-valine                      | 5    | 5089                         | 0.13                | 0.99          | 0.10                   |
| maltose                       | 14   | 641                          | 0.08                | 1.52          | 0.12                   |
| cellobiose                    | 29   | 641                          | 0.08                | 1.73          | 0.11                   |
| N-acetyl-putrescine           | 45   | 1697                         | 0.08                | 1.87          | 0.17                   |
| L-glutamic acid               | 79   | 5549                         | 0.14                | 1.58          | 0.12                   |
| D-glucose                     | 170  | 659                          | -0.07               | 2.17          | 0.12                   |
| spermidine                    | 213  | 1697                         | 0.14                | 2.82          | 0.13                   |
| L-phenylalanine               | 230  | 7685                         | 0.06                | 2.06          | 0.14                   |
| L-tyrosine                    | 251  | 7685                         | 0.11                | 2.07          | 0.19                   |
| N-alpha-acetyl-L-lysine       | 278  | 576                          | 0.11                | 2.94          | 0.16                   |
| L-glutathione-reduced         | 313  | 6268                         | 0.10                | 2.55          | 0.09                   |
| L-methionine                  | 417  | 4982                         | 0.13                | 2.49          | 0.08                   |
| D-xylose                      | 1    | 96                           | 0.09                | 1.85          | 0.47                   |
| D-sorbose                     | 3    | 285                          | -0.07               | 1.59          | 0.16                   |
| lactose                       | 6    | 744                          | 0.08                | 1.71          | 0.18                   |
| N-alpha-acetyl-ornithine      | 7    | 1552                         | 0.18                | 2.18          | 0.18                   |
| AMP                           | 19   | 36                           | 0.12                | 2.69          | 0.76                   |
| D-ribose                      | 26   | 142                          | 0.09                | 2.51          | 0.19                   |
| D-galactose                   | 33   | 659                          | -0.07               | 1.74          | 0.64                   |
| 2-pyrrolidinone-5-carboxylate | 275  | 5549                         | 0.08                | 2.02          | 0.30                   |
| lysine                        | 281  | 576                          | 0.20                | 2.95          | 0.12                   |
| isovalerylglutamic acid       | 289  | 3773                         | 0.13                | 1.8           | 0.14                   |
| S-adenosyl-L-homocysteine     | 332  | 4982                         | 0.07                | 2.3           | 0.62                   |
| gamma-glutamylcysteine        | 367  | 6268                         | -0.05               | 2.55          | 0.19                   |
| D-glucosamine                 | 9    | 144                          | 0.12                | 2.46          | 0.17                   |
| xylulose                      | 10   | 1629                         | 0.09                | 1.69          | 0.74                   |

|                      |     |      |       |      |      |
|----------------------|-----|------|-------|------|------|
| L-arabinose          | 25  | 96   | 0.09  | 2.58 | 0.71 |
| D-tagatose           | 26  | 285  | -0.07 | 1.84 | 0.65 |
| muramic acid         | 32  | 81   | 0.01  | 3.09 | 0.41 |
| melibiose            | 36  | 99   | 0.08  | 2.22 | 0.28 |
| isomaltose           | 38  | 99   | 0.08  | 2.41 | 0.19 |
| D-salicin            | 80  | 744  | -0.06 | 2.29 | 0.25 |
| sucrose              | 136 | 168  | 0.08  | 3.26 | 0.29 |
| beta-gentiobiose     | 345 | 956  | 0.08  | 2.48 | 0.40 |
| D-trehalose          | 378 | 1139 | 0.08  | 2.42 | 0.23 |
| N-acetyl-lactosamine | 427 | 1079 | 0.09  | 2.45 | 0.48 |



**Table S3.** Quantum-chemical calculations of NMR chemical shifts for two selected compounds, together with matching results from experimental spectra. The quantum-chemical calculations were performed according to our MOSS-DFT protocol published recently.<sup>3</sup>

| Compound                                                                                                    | Peak index | Predicted $^1\text{H}$<br>c.s. (ppm) <sup>a</sup> | Predicted $^{13}\text{C}$<br>c.s. (ppm) <sup>a</sup> | Expt. $^1\text{H}$ c.s.<br>(ppm) | Expt. $^{13}\text{C}$ c.s.<br>(ppm) |
|-------------------------------------------------------------------------------------------------------------|------------|---------------------------------------------------|------------------------------------------------------|----------------------------------|-------------------------------------|
| L-fucosamine<br>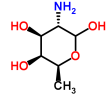           | 1          | 1.342                                             | 17.506                                               | 1.167                            | 19.542                              |
|                                                                                                             | 2          | 3.252                                             | 60.607                                               | 3.618                            | 59.207                              |
|                                                                                                             | 3          | 3.835                                             | 71.816                                               | 4.032                            | 70.725                              |
|                                                                                                             | 4          | 3.893                                             | 73.883                                               | 3.632                            | 75.944                              |
|                                                                                                             | 5          | 3.901                                             | 72.945                                               | 3.767                            | 73.296                              |
|                                                                                                             | 6          | 4.887                                             | 94.099                                               | 5.573                            | 98.048                              |
|                                                                                                             | RMSD (ppm) | 2.9335                                            |                                                      |                                  |                                     |
| 6-desoxy-D-glucosamine<br> | 1          | 1.337                                             | 18.311                                               | 1.167                            | 19.542                              |
|                                                                                                             | 2          | 3.207                                             | 61.619                                               | 3.618                            | 59.207                              |
|                                                                                                             | 3          | 3.737                                             | 73.449                                               | 4.032                            | 70.725                              |
|                                                                                                             | 4          | 3.326                                             | 77.943                                               | 3.632                            | 75.944                              |
|                                                                                                             | 5          | 3.565                                             | 74.916                                               | 3.767                            | 73.296                              |
|                                                                                                             | 6          | 4.949                                             | 93.834                                               | 5.573                            | 98.048                              |
|                                                                                                             | RMSD (ppm) | 3.1622                                            |                                                      |                                  |                                     |

**Table S4.** Unknown spin systems identified in *E. coli* cell lysate by 3D HSQC-TOCSY and compound candidates (top hits) returned by SUMMIT.

| Unknown spin system peak list<br>( $\delta_H$ , $\delta_C$ ) ppm                                                | Top hit                                                                             | ChemSpider ID | RMSD (ppm) |
|-----------------------------------------------------------------------------------------------------------------|-------------------------------------------------------------------------------------|---------------|------------|
| (4.093, 73.531)<br>(3.434, 75.502)<br>(3.387, 74.313)<br>(1.315, 19.470)                                        | 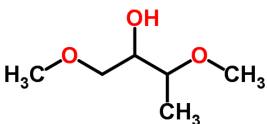   | 36208103      | 1.98       |
| (1.167, 19.542)<br>(3.767, 73.296)<br>(4.032, 70.725)<br>(3.618, 59.207)<br>(5.573, 98.048)                     |    | 32971157      | 3.23       |
| (4.523, 55.624)<br>(4.063, 74.956)<br>(3.809, 80.235)<br>(4.864, 100.947)                                       |    | 26596688      | 2.69       |
| (2.058, 30.448)<br>(2.283, 36.248)<br>(4.305, 56.298)<br>(1.918, 30.569)                                        |   | 32970114      | 2.58       |
| (3.948, 63.316)<br>(3.481, 71.620)<br>(3.801, 78.104)<br>(3.781, 63.146)<br>(4.858, 105.234)                    |  | 4324706       | 2.38       |
| (4.058, 67.096)<br>(4.189, 67.116)<br>(3.592, 77.226)<br>(3.391, 75.683)<br>(3.481, 71.620)<br>(4.643, 105.803) |  | 27471393      | 2.36       |
| (3.481, 71.620)<br>(3.801, 78.104)<br>(3.864, 63.231)<br>(4.858, 105.234)                                       |  | 29369739      | 2.81       |
| (4.376, 65.593)<br>(3.714, 75.454)<br>(3.703, 76.472)<br>(4.464, 65.664)<br>(4.841, 105.758)                    |  | 10264285      | 3.96       |

|                                                                                                                |                                                                                     |          |      |
|----------------------------------------------------------------------------------------------------------------|-------------------------------------------------------------------------------------|----------|------|
| (3.864, 63.231)<br>(3.607, 84.515)<br>(3.772, 78.845)<br>(4.858, 105.234)                                      | 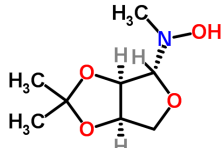   | 9334888  | 3.03 |
| (3.781, 63.146)<br>(3.607, 84.515)<br>(4.858, 105.234)<br>(3.772, 78.845)                                      |    | 263432   | 4.23 |
| (3.607, 84.515)<br>(3.948, 63.316)<br>(5.418, 94.247)                                                          |    | 4981062  | 3.68 |
| (1.413, 24.783)<br>(3.002, 41.766)<br>(4.166, 57.181)<br>(1.766, 33.713)                                       |    | 9314583  | 2.03 |
| (1.167, 19.542)<br>(3.767, 73.296)<br>(4.032, 70.725)<br>(3.618, 59.207)<br>(5.573, 98.048)<br>(3.598, 75.523) |    | 9919658  | 3.22 |
| (2.705, 29.164)<br>(3.864, 56.460)<br>(2.162, 32.873)                                                          |  | 37527314 | 0.86 |
| (3.817, 70.012)<br>(3.593, 72.692)<br>(5.241, 94.598)                                                          |  | 17253887 | 2.39 |

## References

- (1) Cavanagh, J.; Fairbrother, W. J.; Palmer III, A. G.; Skelton, N. J.; Rance, M., *Protein NMR Spectroscopy (Second Edition): Principles and Practice*. Academic Press, **2007**; pp 280-289.
- (2) Braunschweiler, L.; Ernst, R.R., Coherence transfer by isotropic mixing: application to proton correlation spectroscopy. *J. Mag. Reson.* **1983**, 53, 521-528.
- (3) Hoffmann, F.; Li, D. W.; Sebastiani, D.; Brüsweiler, R., Improved quantum chemical NMR chemical shift prediction of metabolites in aqueous solution toward the validation of unknowns. *J. Phys. Chem. A* **2017**, 121, 3071-3078.
